# Supplementary material for: Type III CRISPR-Cas systems can provide redundancy to counteract viral escape from type I systems
Source: eLife. 2017 Aug 17;6:e27601. doi: 10.7554/eLife.27601 (PMC5576922; doi:10.7554/eLife.27601)
Supplement: Figure 1—source data 1. — Each box represents an independent conjugation. Assay detection limits are reported for conjugations where no viable transconjugants were observed. TMTC denotes the conjugation produced ‘too many [colonies] to count’. The protospacer configuration of each plasmid is represented in the ‘Plasmids’ column. Protospacers matching the first or second spacer sequences from the III-B or I-F arrays were used as indicated. RC denotes that the reverse complement of a particular configuration was used. DR signifies that the protospacer was flanked by CRISPR repeats of the same array as the spacers. [file elife-27601-fig1-data1.xlsx]

## Sheet: Sheet1
FIGURE 1C
Plasmid	WT	∆III-B	∆Cmr2	∆Cmr4	Cmr2::GGAA	Cmr4::D26A	GFP-Cmr2	∆I-F CRISPR04	∆I-F Cas123	∆I-F	∆I-F ∆III-B
III-B Spacer1	1500000	116000	TMTC	181600	317500	34000	17200	174800	94000	66800	85600
III-B Spacer1RC	< 1000	140000	TMTC	108800	1230000	< 2000	< 400	< 400	< 2000	< 400	74800
III-B Spacer1-DR	1400000	128000	TMTC	238000	330000	44000	256800	231200	84000	208000	288000
III-B Spacer1-DR-RC	1200000	112000	TMTC	204400	177500	66000	133200	273600	62000	315600	206400
III-B Spacer2	2900000	108000	TMTC	92800	1642500	72000	243200	271600	390000	236400	303600
III-B Spacer2RC	15000	152000	TMTC	525200	1657500	< 2000	3600	< 400	2000	800	122000
III-B Spacer2-DR	1100000	164000	TMTC	293200	2312500	42000	333200	322800	192000	248400	68400
III-B Spacer2-DR-RC	800000	156000	TMTC	396800	2057500	120000	352000	128400	272000	293600	20400
Figure 1-Source Data 1: Colony forming units per mL (cfu/ml) counts obtained from conjugations for plasmid interference assays. Each box represents an independent conjugation. Assay detection limits are reported for conjugations where no viable transconjugants were observed. TMTC denotes the conjugation produced "too many [colonies] to count". The protospacer configuration of each plasmid is repr…
