# Supplementary material for: Type III CRISPR-Cas systems can provide redundancy to counteract viral escape from type I systems
Source: eLife. 2017 Aug 17;6:e27601. doi: 10.7554/eLife.27601 (PMC5576922; doi:10.7554/eLife.27601)
Supplement: Figure 3—source data 1. — Each box represents an independent conjugation. Assay detection limits are reported for conjugations where no viable transconjugants were observed. TMTC denotes the conjugation produced ‘too many [colonies] to count’. The protospacer configuration of each plasmid is represented in the ‘Plasmids’ column. Protospacers matching the first or second spacer sequences from the III-B or I-F arrays were used as indicated. RC denotes that the reverse complement of a particular configuration was used. DR signifies that the protospacer was flanked by CRISPR repeats of the same array as the spacers. [file elife-27601-fig3-data1.xlsx]

## Sheet: Sheet1
FIGURE 3E
Plasmid	WT	∆III-B	∆Cmr2	∆Cmr4	Cmr2::GGAA	Cmr4::D26A	GFP-Cmr2	∆I-F CRISPR04	∆I-F Cas123	∆I-F	∆I-F ∆III-B
I-F Spacer1	160000	180000	TMTC	117500	125000	28000	129600	83200	38000	159200	200800
I-F Spacer1RC	< 1000	160000	TMTC	75000	300000	< 2000	< 400	104400	< 1000	260000	119600
I-F Spacer1-DR	68000	120000	TMTC	205000	612500	36000	42400	412800	58000	238800	257600
I-F Spacer1-DR-RC	88000	132000	TMTC	385000	817500	50000	10800	160400	52000	161200	91600
I-F Spacer2	76000	104000	TMTC	82500	982500	38000	26800	143200	176000	146800	399200
I-F Spacer2RC	< 1000	108000	TMTC	125000	827500	4000	< 400	132800	< 1000	166800	802000
I-F Spacer2-DR	68000	80000	TMTC	190000	1290000	52000	23600	197600	152000	112400	330000
I-F Spacer2-DR-RC	12000	48000	TMTC	47500	22500	40000	41200	318400	318000	149200	284000
Figure 3-Source Data 1: Colony forming units per mL (cfu/ml) counts obtained from conjugations for plasmid interference assays. Each box represents an independent conjugation. Assay detection limits are reported for conjugations where no viable transconjugants were observed. TMTC denotes the conjugation produced "too many [colonies] to count". The protospacer configuration of each plasmid is repr…
