# Supplementary material for: Type III CRISPR-Cas systems can provide redundancy to counteract viral escape from type I systems
Source: eLife. 2017 Aug 17;6:e27601. doi: 10.7554/eLife.27601 (PMC5576922; doi:10.7554/eLife.27601)
Supplement: Figure 5—source data 1. — Each box represents an independent conjugation. Assay detection limits are reported for conjugations where no viable transconjugants were observed. TMTC denotes the conjugation produced ‘too many [colonies] to count’. The protospacer configuration of each plasmid is represented in the ‘Plasmids’ column. Protospacers matching the first or second spacer sequences from the III-B or I-F arrays were used as indicated. RC denotes that the reverse complement of a particular configuration was used. DR signifies that the protospacer was flanked by CRISPR repeats of the same array as the spacers. PAM signifies that the type I-F GG PAM sequence was restored. Plasmids for Figure 5C and D in boldface represent data that were reproduced from Figures 1C and 3E. [file elife-27601-fig5-data1.xlsx]

## Sheet: Sheet1
FIGURE 5C
Plasmid	WT	∆III-B	∆I-F Cas123	∆I-F	∆I-F ∆III-B		Figure 5-Source Data 1: Colony forming units per mL (cfu/ml) counts obtained from conjugations for plasmid interference assays. Each box represents an independent conjugation. Assay detection limits are reported for conjugations where no viable transconjugants were observed. TMTC denotes the conjugation produced "too many [colonies] to count". The protospacer configuration of each plasmid is repr…
I-F Spacer1-PAM	< 1000	< 1000	276000	124000	299000
I-F Spacer1-PAM-RC	< 1000	< 1000	< 1000	90000	464000
I-F Spacer1-DR	68000	120000	58000	238800	257600
I-F Spacer1-DR-RC	88000	132000	52000	161200	91600
I-F Spacer2-PAM	< 1000	< 1000	1312000	26000	451000
I-F Spacer2-PAM-RC	< 1000	< 1000	< 1000	17000	4850000
I-F Spacer2-DR	68000	80000	152000	112400	330000
I-F Spacer2-DR-RC	12000	48000	318000	149200	284000
FIGURE 5D
Plasmid	WT	∆III-B	∆I-F Cas123	∆I-F	∆I-F ∆III-B
III-B Spacer1-PAM	476500	378500	180000	7500	118000
III-B Spacer1-PAM-RC	< 500	91000	< 500	< 500	166500
III-B Spacer1-DR	1400000	128000	84000	208000	288000
III-B Spacer1-DR-RC	1200000	112000	62000	315600	206400
III-B Spacer2-PAM	211500	52500	88000	102000	593000
III-B Spacer2-PAM-RC	15500	1031000	< 500	< 500	824500
III-B Spacer2-DR	1100000	164000	192000	248400	68400
III-B Spacer2-DR-RC	800000	156000	272000	293600	20400
