# Supplementary material for: Type III CRISPR-Cas systems can provide redundancy to counteract viral escape from type I systems
Source: eLife. 2017 Aug 17;6:e27601. doi: 10.7554/eLife.27601 (PMC5576922; doi:10.7554/eLife.27601)
Supplement: Figure 7—source data 1. — A score of X/Y in the last column implies that a CB5A protein is X% identical and Y% similar to its cognate CPG1g protein. Chromosomal start and end positions in the CPG1g genome are noted next to the CPG1g gene accessions. A short description of the putative gene product is also included. [file elife-27601-fig7-data1.xls]

## Sheet: Feature Table CPG1g
CPG1g. Gene accesion				CB5A. Gene naming	Identity/Similarity vs CPG1g (%)
				peg1	0
				peg2	0
	Start	End	product
ARB11270.1	750	604	hypothetical protein	peg3.	61/72
				peg4.	0
ARB11271.1	899	1102	hypothetical protein	peg.5	65/81
ARB11272	1104	1892	hypothetical protein	peg.6	54/68
ARB11273	1897	2067	hypothetical protein. Similar to protein T7 06A [CRISPR04 Spacer2 target]	peg.7	98/98
ARB11274.1	2064	2411	hypothetical protein	peg.8	99/100
ARB11275.1	2481	3068	hypothetical protein	peg.9	99/99
ARB11276.1	3082	3579	hypothetical protein	peg.10	100
ARB11277	3576	3929	hypothetical protein	peg.11	100
ARB11278.1	3910	4383	hypothetical protein	peg.12	100
ARB11279.1	4380	4946	hypothetical protein [CRISPR04 Spacer 3 target]	peg.13	97/97
ARB11280.1	4957	5757	Phage protein. Similar to Phi138 gp6	peg.14	99/99
ARB11281.1	5760	6008	hypothetical protein	peg15	80/67
ARB11282.1	6012	8750	DNA-directed RNA polymerase (EC 2.7.7.6) [CRISPR04 Spacer1 target)	peg.16	99/99
ARB11283.1	8966	9127	hypothetical protein	peg17	98/98
ARB11284.1	9127	11229	DNA primase/helicase, phage-associated	peg.18	99/99
ARB11285.1	11293	11733	hypothetical protein. Similar to Phi138 RJ80_gp07	peg.19	94/97
ARB11286.1	11723	12142	hypothetical protein	peg.20	65/75
ARB11287.1	12204	14756	DNA polymerase (EC 2.7.7.7), phage-associated	peg21	98/99
ARB11288.1	14822	15139	hypothetical protein	peg22	88/94
ARB11289.1	15152	15541	hypothetical protein	peg.23	85/92
tRNA	15658	15731	tRNA-Arg
ARB11290.1	15767	16534	Phage protein	peg.24	99/99
ARB11291.1	16585	16941	Phage protein	peg.25	99/100
ARB11292.1	17020	18231	Phage exonuclease	peg.26	99/99
ARB11293.1	18221	18658	Phage endonuclease	peg.27	99/100
ARB11294.1	18669	19682	Phage protein	peg.28	98/98
ARB11295.1	19713	20288	Phage protein. Similar to JK_59P	peg.29	88/94
ARB11296.1	20290	21246	DNA ligase, phage-associated	peg.30	82/88
ARB11297.1	21273	21434	hypothetical protein	peg31	98/100
ARB11298.1	21427	21627	hypothetical protein	peg32	98/98
ARB11299.1	21617	22069	Phage protein	peg.33	99/100
ARB11300.1	22069	22248	hypothetical protein	peg.34	100
ARB11301.1	22258	23874	Phage collar / T7-like phage head-to-tail joining protein	peg35	100
ARB11302.1	23879	24772	Phage capsid and scaffold	peg.36	98/98
ARB11303.1	24809	25963	Phage capsid and scaffold	peg37	99/99
ARB11304.1	26023	26667	Phage tail fibers	peg.38	100
ARB11305.1	26676	29279	Phage tail fiber protein / T7-like tail tubular protein B	peg.39	99/99
ARB11306.1	29289	29834	Putative internal virion protein A, PHA01547 super family	peg.40	99/99
ARB11307.1	29836	31965	hypothetical protein	peg.41	99/99
ARB11308.1	31978	36183	Phage protein inside capsid D. Lysozyme_like super family, cl00222	peg42	100
ARB11309.1	36218	37240	Phage tail fibers	peg.44	98/98
ARB11310.1	37252	37431	hypothetical protein	peg.45	100
ARB11311.1	37433	37780	hypothetical protein. Small terminase subunit-like protein	peg.46	100
ARB11312.1	37780	39636	Phage DNA packaging. Large terminase subunit	peg.47	99/100
ARB11313.1	39847	40143	hypothetical protein	peg.48	100
ARB11314.1	40171	40848	hypothetical protein	peg.49	100
ARB11315.1	40949	43240	hypothetical protein	peg50	99/99
ARB11316.1	43336	43638	hypothetical protein	peg.51	100
ARB11317.1	43639	43758	hypothetical protein	peg.52	100
ARB11318.1	43761	44045	hypothetical protein	peg.53	100
ARB11319	44038	44244	hypothetical protein	peg.54	100
