# Supplementary material for: Type III CRISPR-Cas systems can provide redundancy to counteract viral escape from type I systems
Source: eLife. 2017 Aug 17;6:e27601. doi: 10.7554/eLife.27601 (PMC5576922; doi:10.7554/eLife.27601)
Supplement: Supplementary file 1. [file elife-27601-supp1.xlsx]

## Sheet: Sheet1
HIGH-THROUGHPUT SEQUENCING DATA GENERATED IN THIS STUDY
BIOPROJECT	LIBRARY ID	DESCRIPTION
PRJNA382859	cas6hisRNAseq2-spcproc2-AH03-3-emptyIFdelIIIBdel-AH40	Small RNA sequencing of MMB-1 strain with I-F and III-B operons deleted; CRISPR03 supplied on a pKT230 vector
PRJNA382859	cas6hisRNAseq-spcproc2-AH03-3-emptyIFdelIIIBdel-AH40	Small RNA sequencing of MMB-1 strain with I-F and III-B operons deleted; CRISPR03 supplied on a pKT230 vector
PRJNA382859	cas6hisRNAseq-spcproc2-AH03-4-emptyIFdelIIIBdel-AH41	Small RNA sequencing of MMB-1 strain with I-F and III-B operons deleted; CRISPR03 supplied on a pKT230 vector
PRJNA382859	cas6hisRNAseq2-spcproc2-AE68-30-wtpIFdelIIIBdel-AH46	Small RNA sequencing of MMB-1 strain with I-F and III-B operons deleted; RT-Cas1, Cas2, Marme_0670 and CRISPR03 supplied on a pKT230 vector
PRJNA382859	cas6hisRNAseq-spcproc2-AE68-30-wtpIFdelIIIBdel-AH46	Small RNA sequencing of MMB-1 strain with I-F and III-B operons deleted; RT-Cas1, Cas2, Marme_0670 and CRISPR03 supplied on a pKT230 vector
PRJNA382859	cas6hisRNAseq-spcproc2-AE69-32-wtpIFdelIIIBdel-AH47	Small RNA sequencing of MMB-1 strain with I-F and III-B operons deleted; RT-Cas1, Cas2, Marme_0670 and CRISPR03 supplied on a pKT230 vector
PRJNA382859	cas6hisRNAseq2-spcproc2-AH01-1-emptyOpDel-AH38	Small RNA sequencing of MMB-1 strain with III-B operon deleted; CRISPR03 supplied on a pKT230 vector
PRJNA382859	cas6hisRNAseq-spcproc2-AH01-1-emptyOpDel-AH38	Small RNA sequencing of MMB-1 strain with III-B operon deleted; CRISPR03 supplied on a pKT230 vector
PRJNA382859	cas6hisRNAseq-spcproc2-AH01-2-emptyOpDel-AH39	Small RNA sequencing of MMB-1 strain with III-B operon deleted; CRISPR03 supplied on a pKT230 vector
PRJNA382859	cas6hisRNAseq2-spcproc2-Z70-1-wtpOpDel-AH48	Small RNA sequencing of MMB-1 strain with III-B operon deleted; RT-Cas1, Cas2, Marme_0670 and CRISPR03 supplied on a pKT230 vector
PRJNA382859	cas6hisRNAseq-spcproc2-Z70-1-wtpOpDel-AH48	Small RNA sequencing of MMB-1 strain with III-B operon deleted; RT-Cas1, Cas2, Marme_0670 and CRISPR03 supplied on a pKT230 vector
PRJNA382859	cas6hisRNAseq-spcproc2-Z71-4-wtpOpDel-AH49	Small RNA sequencing of MMB-1 strain with III-B operon deleted; RT-Cas1, Cas2, Marme_0670 and CRISPR03 supplied on a pKT230 vector
PRJNA382859	MMB1-Cmr2mutRTPCR-AJ06-DNA-AJ12	Targeted DNA sequencing to determine if all plasmids are present in Cmr2:GGAA MMB-1 transconjugant strain mixture with 8 protospacer configurations on pKT230 vectors
PRJNA382859	MMB1-Cmr2mutRTPCR-AJ07-RNA-AJ13	Targeted RNA sequencing to determine if protospacer RNA is degraded in Cmr2:GGAA MMB-1 transconjugant strain mixture with 8 protospacer configurations on pKT230 vectors
PRJNA382859	MMB1-Cmr4D26AmixRTPCR-AJ62-DNA-AJ75	Targeted DNA sequencing to determine if all plasmids are present in Cmr4:D26A MMB-1 transconjugant strain mixture with 4 protospacer configurations on pKT230 vectors
PRJNA382859	MMB1-Cmr4D26AmixRTPCR-AJ66-RNA-AJ77	Targeted RNA sequencing to determine if protospacer RNA is degraded in Cmr4:D26A MMB-1 transconjugant strain mixture with 4 protospacer configurations on pKT230 vectors
PRJNA382859	MMB1-WTmixRTPCR-AJ61-DNA-AJ74	Targeted DNA sequencing to determine if all plasmids are present in WT MMB-1 transconjugant strain mixture with 4 protospacer configurations on pKT230 vectors
PRJNA382859	MMB1-WTmixRTPCR-AJ64-RNA-AJ76	Targeted RNA sequencing to determine if protospacer RNA is degraded in WT MMB-1 transconjugant strain mixture with 4 protospacer configurations on pKT230 vectors
PRJNA382859	MMB1-ectoTMtd-cas123-S19-10-wtp-AL23-AL74	RT-Cas1, Cas2, and Marme_0670 over-expressed in WT MMB-1; spacers amplified from plasmid CRISPR03 array; td intron in ssrA
PRJNA382859	MMB1-ectoTMtd-cas123-S19-10-wtp-AL23-AL75	RT-Cas1, Cas2, and Marme_0670 over-expressed in WT MMB-1; spacers amplified from plasmid CRISPR03 array; td intron in ssrA
PRJNA382859	MMB1-ectoTMtd-cas123-S20-12-wtp-AL24-AL76	RT-Cas1, Cas2, and Marme_0670 over-expressed in WT MMB-1; spacers amplified from plasmid CRISPR03 array; td intron in ssrA
PRJNA382859	MMB1-ectoTMtd-cas123-S20-12-wtp-AL24-AL77	RT-Cas1, Cas2, and Marme_0670 over-expressed in WT MMB-1; spacers amplified from plasmid CRISPR03 array; td intron in ssrA
PRJNA382859	MMB1-ectoTMtd-castwo-S19-10-wtp-AA63-AA87	RT-Cas1, Cas2, and Marme_0670 over-expressed in WT MMB-1; spacers amplified from plasmid CRISPR03 array; td intron in ssrA
PRJNA382859	MMB1-ectoTMtd-castwo-S19-10-wtp-AA63-AA88	RT-Cas1, Cas2, and Marme_0670 over-expressed in WT MMB-1; spacers amplified from plasmid CRISPR03 array; td intron in ssrA
PRJNA382859	MMB1-ectoTMtd-castwo-S20-12-wtp-AA64-AA89	RT-Cas1, Cas2, and Marme_0670 over-expressed in WT MMB-1; spacers amplified from plasmid CRISPR03 array; td intron in ssrA
PRJNA382859	MMB1-ectoTMtd-castwo-S20-12-wtp-AA64-AA90	RT-Cas1, Cas2, and Marme_0670 over-expressed in WT MMB-1; spacers amplified from plasmid CRISPR03 array; td intron in ssrA
PRJNA382859	MMB1-ectoTMtd-gendel-S19-10-wtp-Z86-AA07	RT-Cas1, Cas2, and Marme_0670 over-expressed in WT MMB-1; spacers amplified from plasmid CRISPR03 array; td intron in ssrA
PRJNA382859	MMB1-ectoTMtd-gendel-S19-10-wtp-Z86-AA08	RT-Cas1, Cas2, and Marme_0670 over-expressed in WT MMB-1; spacers amplified from plasmid CRISPR03 array; td intron in ssrA
PRJNA382859	MMB1-ectoTMtd-gendel-S20-12-wtp-Z87-AA09	RT-Cas1, Cas2, and Marme_0670 over-expressed in WT MMB-1; spacers amplified from plasmid CRISPR03 array; td intron in ssrA
PRJNA382859	MMB1-ectoTMtd-gendel-S20-12-wtp-Z87-AA10	RT-Cas1, Cas2, and Marme_0670 over-expressed in WT MMB-1; spacers amplified from plasmid CRISPR03 array; td intron in ssrA
PRJNA382859	MMB1-ectoTMtd-mutants-S19-10-wtp-X98-Y02	RT-Cas1, Cas2, and Marme_0670 over-expressed in WT MMB-1; spacers amplified from plasmid CRISPR03 array; td intron in ssrA
PRJNA382859	MMB1-ectoTMtd-mutants-S19-10-wtp-X98-Y03	RT-Cas1, Cas2, and Marme_0670 over-expressed in WT MMB-1; spacers amplified from plasmid CRISPR03 array; td intron in ssrA
PRJNA382859	MMB1-ectoTMtd-mutants-S19-10-wtp-X99-Y04	RT-Cas1, Cas2, and Marme_0670 over-expressed in WT MMB-1; spacers amplified from plasmid CRISPR03 array; td intron in ssrA
PRJNA382859	MMB1-ectoTMtd-mutants-S19-10-wtp-X99-Y05	RT-Cas1, Cas2, and Marme_0670 over-expressed in WT MMB-1; spacers amplified from plasmid CRISPR03 array; td intron in ssrA
PRJNA382859	MMB1-ectoTMtd-mutants-S20-12-wtp-Y00-Y06	RT-Cas1, Cas2, and Marme_0670 over-expressed in WT MMB-1; spacers amplified from plasmid CRISPR03 array; td intron in ssrA
PRJNA382859	MMB1-ectoTMtd-mutants-S20-12-wtp-Y00-Y07	RT-Cas1, Cas2, and Marme_0670 over-expressed in WT MMB-1; spacers amplified from plasmid CRISPR03 array; td intron in ssrA
PRJNA382859	MMB1-ectoTMtd-mutants-S20-12-wtp-Y01-Y08	RT-Cas1, Cas2, and Marme_0670 over-expressed in WT MMB-1; spacers amplified from plasmid CRISPR03 array; td intron in ssrA
PRJNA382859	MMB1-ectoTMtd-mutants-S20-12-wtp-Y01-Y09	RT-Cas1, Cas2, and Marme_0670 over-expressed in WT MMB-1; spacers amplified from plasmid CRISPR03 array; td intron in ssrA
PRJNA382859	MMB1-ectoTMtd-newdel-S19-10-wt-AE70-AF07	RT-Cas1, Cas2, and Marme_0670 over-expressed in WT MMB-1; spacers amplified from plasmid CRISPR03 array; td intron in ssrA
PRJNA382859	MMB1-ectoTMtd-newdel-S19-10-wt-AE70-AF08	RT-Cas1, Cas2, and Marme_0670 over-expressed in WT MMB-1; spacers amplified from plasmid CRISPR03 array; td intron in ssrA
PRJNA382859	MMB1-ectoTMtd-newdel-S20-12-wt-AE71-AF05	RT-Cas1, Cas2, and Marme_0670 over-expressed in WT MMB-1; spacers amplified from plasmid CRISPR03 array; td intron in ssrA
PRJNA382859	MMB1-ectoTMtd-newdel-S20-12-wt-AE71-AF06	RT-Cas1, Cas2, and Marme_0670 over-expressed in WT MMB-1; spacers amplified from plasmid CRISPR03 array; td intron in ssrA
PRJNA382859	MMB1-ectoTMtd-cas6again-Z70-1-OpDel-AH14-AH32	RT-Cas1, Cas2, and Marme_0670 over-expressed in MMB-1 with III-B operon deleted; spacers amplified from plasmid CRISPR03 array; td intron in ssrA
PRJNA382859	MMB1-ectoTMtd-cas6again-Z70-1-OpDel-AH14-AH33	RT-Cas1, Cas2, and Marme_0670 over-expressed in MMB-1 with III-B operon deleted; spacers amplified from plasmid CRISPR03 array; td intron in ssrA
PRJNA382859	MMB1-ectoTMtd-cas6again-Z71-4-OpDel-AH15-AH34	RT-Cas1, Cas2, and Marme_0670 over-expressed in MMB-1 with III-B operon deleted; spacers amplified from plasmid CRISPR03 array; td intron in ssrA
PRJNA382859	MMB1-ectoTMtd-cas6again-Z71-4-OpDel-AH15-AH35	RT-Cas1, Cas2, and Marme_0670 over-expressed in MMB-1 with III-B operon deleted; spacers amplified from plasmid CRISPR03 array; td intron in ssrA
PRJNA382859	MMB1-ectoTMtd-castwo-Z70-1-wtpOpdel-AA65-AA91	RT-Cas1, Cas2, and Marme_0670 over-expressed in MMB-1 with III-B operon deleted; spacers amplified from plasmid CRISPR03 array; td intron in ssrA
PRJNA382859	MMB1-ectoTMtd-castwo-Z70-1-wtpOpdel-AA65-AA92	RT-Cas1, Cas2, and Marme_0670 over-expressed in MMB-1 with III-B operon deleted; spacers amplified from plasmid CRISPR03 array; td intron in ssrA
PRJNA382859	MMB1-ectoTMtd-castwo-Z71-4-wtpOpdel-AA66-AA93	RT-Cas1, Cas2, and Marme_0670 over-expressed in MMB-1 with III-B operon deleted; spacers amplified from plasmid CRISPR03 array; td intron in ssrA
PRJNA382859	MMB1-ectoTMtd-castwo-Z71-4-wtpOpdel-AA66-AA94	RT-Cas1, Cas2, and Marme_0670 over-expressed in MMB-1 with III-B operon deleted; spacers amplified from plasmid CRISPR03 array; td intron in ssrA
PRJNA382859	MMB1-ectoTMtd-dsrna-Z70-1-wtpOpDel-AE09-AE27	RT-Cas1, Cas2, and Marme_0670 over-expressed in MMB-1 with III-B operon deleted; spacers amplified from plasmid CRISPR03 array; td intron in ssrA
PRJNA382859	MMB1-ectoTMtd-dsrna-Z70-1-wtpOpDel-AE09-AE28	RT-Cas1, Cas2, and Marme_0670 over-expressed in MMB-1 with III-B operon deleted; spacers amplified from plasmid CRISPR03 array; td intron in ssrA
PRJNA382859	MMB1-ectoTMtd-dsrna-Z71-4-wtpOpDel-AE10-AE29	RT-Cas1, Cas2, and Marme_0670 over-expressed in MMB-1 with III-B operon deleted; spacers amplified from plasmid CRISPR03 array; td intron in ssrA
PRJNA382859	MMB1-ectoTMtd-dsrna-Z71-4-wtpOpDel-AE10-AE30	RT-Cas1, Cas2, and Marme_0670 over-expressed in MMB-1 with III-B operon deleted; spacers amplified from plasmid CRISPR03 array; td intron in ssrA
PRJNA382859	MMB1-ectoTMtd-gendel-Z70-1-wtpOpdel-Z88-AA11	RT-Cas1, Cas2, and Marme_0670 over-expressed in MMB-1 with III-B operon deleted; spacers amplified from plasmid CRISPR03 array; td intron in ssrA
PRJNA382859	MMB1-ectoTMtd-gendel-Z70-1-wtpOpdel-Z88-AA12	RT-Cas1, Cas2, and Marme_0670 over-expressed in MMB-1 with III-B operon deleted; spacers amplified from plasmid CRISPR03 array; td intron in ssrA
PRJNA382859	MMB1-ectoTMtd-gendel-Z71-4-wtpOpdel-Z89-AA13	RT-Cas1, Cas2, and Marme_0670 over-expressed in MMB-1 with III-B operon deleted; spacers amplified from plasmid CRISPR03 array; td intron in ssrA
PRJNA382859	MMB1-ectoTMtd-gendel-Z71-4-wtpOpdel-Z89-AA14	RT-Cas1, Cas2, and Marme_0670 over-expressed in MMB-1 with III-B operon deleted; spacers amplified from plasmid CRISPR03 array; td intron in ssrA
PRJNA382859	MMB1-ectoTMtd-gendel-Z72-6-wtpCmrdel-Z90-AA15	RT-Cas1, Cas2, and Marme_0670 over-expressed in MMB-1 with cmr gene cassette deleted; spacers amplified from plasmid CRISPR03 array; td intron in ssrA
PRJNA382859	MMB1-ectoTMtd-gendel-Z72-6-wtpCmrdel-Z90-AA16	RT-Cas1, Cas2, and Marme_0670 over-expressed in MMB-1 with cmr gene cassette deleted; spacers amplified from plasmid CRISPR03 array; td intron in ssrA
PRJNA382859	MMB1-ectoTMtd-gendel-Z73-8-wtpCmrdel-Z91-AA17	RT-Cas1, Cas2, and Marme_0670 over-expressed in MMB-1 with cmr gene cassette deleted; spacers amplified from plasmid CRISPR03 array; td intron in ssrA
PRJNA382859	MMB1-ectoTMtd-gendel-Z73-8-wtpCmrdel-Z91-AA18	RT-Cas1, Cas2, and Marme_0670 over-expressed in MMB-1 with cmr gene cassette deleted; spacers amplified from plasmid CRISPR03 array; td intron in ssrA
PRJNA382859	MMB1-ectoTMtd-gendel-X36-26-RTdel-Z92-AA19	RT deleted version of RT-Cas1, Cas2, and Marme_0670 over-expressed in WT MMB-1; spacers amplified from plasmid CRISPR03 array; td intron in ssrA
PRJNA382859	MMB1-ectoTMtd-gendel-X36-26-RTdel-Z92-AA20	RT deleted version of RT-Cas1, Cas2, and Marme_0670 over-expressed in WT MMB-1; spacers amplified from plasmid CRISPR03 array; td intron in ssrA
PRJNA382859	MMB1-ectoTMtd-gendel-X37-28-RTdel-Z93-AA21	RT deleted version of RT-Cas1, Cas2, and Marme_0670 over-expressed in WT MMB-1; spacers amplified from plasmid CRISPR03 array; td intron in ssrA
PRJNA382859	MMB1-ectoTMtd-gendel-X37-28-RTdel-Z93-AA22	RT deleted version of RT-Cas1, Cas2, and Marme_0670 over-expressed in WT MMB-1; spacers amplified from plasmid CRISPR03 array; td intron in ssrA
PRJNA382859	MMB1-ectoTMtd-gendel-Z74-9-RTdelOpdel-Z94-AA23	RT deleted version of RT-Cas1, Cas2, and Marme_0670 over-expressed in MMB-1 with III-B operon deleted; spacers amplified from plasmid CRISPR03 array; td intron in ssrA
PRJNA382859	MMB1-ectoTMtd-gendel-Z74-9-RTdelOpdel-Z94-AA24	RT deleted version of RT-Cas1, Cas2, and Marme_0670 over-expressed in MMB-1 with III-B operon deleted; spacers amplified from plasmid CRISPR03 array; td intron in ssrA
PRJNA382859	MMB1-ectoTMtd-gendel-Z75-11-RTdelOpdel-Z95-AA25	RT deleted version of RT-Cas1, Cas2, and Marme_0670 over-expressed in MMB-1 with III-B operon deleted; spacers amplified from plasmid CRISPR03 array; td intron in ssrA
PRJNA382859	MMB1-ectoTMtd-gendel-Z75-11-RTdelOpdel-Z95-AA26	RT deleted version of RT-Cas1, Cas2, and Marme_0670 over-expressed in MMB-1 with III-B operon deleted; spacers amplified from plasmid CRISPR03 array; td intron in ssrA
PRJNA382859	MMB1-ectoTMtd-gendel-Z76-14-RTdelCmrdel-Z96-AA27	RT deleted version of RT-Cas1, Cas2, and Marme_0670 over-expressed in MMB-1 with Cmr gene cassette deleted; spacers amplified from plasmid CRISPR03 array; td intron in ssrA
PRJNA382859	MMB1-ectoTMtd-gendel-Z76-14-RTdelCmrdel-Z96-AA28	RT deleted version of RT-Cas1, Cas2, and Marme_0670 over-expressed in MMB-1 with Cmr gene cassette deleted; spacers amplified from plasmid CRISPR03 array; td intron in ssrA
PRJNA382859	MMB1-ectoTMtd-gendel-Z77-16-RTdelCmrdel-Z97-AA29	RT deleted version of RT-Cas1, Cas2, and Marme_0670 over-expressed in MMB-1 with Cmr gene cassette deleted; spacers amplified from plasmid CRISPR03 array; td intron in ssrA
PRJNA382859	MMB1-ectoTMtd-gendel-Z77-16-RTdelCmrdel-Z97-AA30	RT deleted version of RT-Cas1, Cas2, and Marme_0670 over-expressed in MMB-1 with Cmr gene cassette deleted; spacers amplified from plasmid CRISPR03 array; td intron in ssrA
PRJNA382859	MMB1-ectoTMtd-newdel-AE54-2-Cmr2Del-AE74-AF11	RT-Cas1, Cas2, and Marme_0670 over-expressed in MMB-1 with Cmr2 deleted; spacers amplified from plasmid CRISPR03 array; td intron in ssrA
PRJNA382859	MMB1-ectoTMtd-newdel-AE54-2-Cmr2Del-AE74-AF12	RT-Cas1, Cas2, and Marme_0670 over-expressed in MMB-1 with Cmr2 deleted; spacers amplified from plasmid CRISPR03 array; td intron in ssrA
PRJNA382859	MMB1-ectoTMtd-newdel-AE55-4-Cmr2Del-AE75-AF13	RT-Cas1, Cas2, and Marme_0670 over-expressed in MMB-1 with Cmr2 deleted; spacers amplified from plasmid CRISPR03 array; td intron in ssrA
PRJNA382859	MMB1-ectoTMtd-newdel-AE55-4-Cmr2Del-AE75-AF14	RT-Cas1, Cas2, and Marme_0670 over-expressed in MMB-1 with Cmr2 deleted; spacers amplified from plasmid CRISPR03 array; td intron in ssrA
PRJNA382859	MMB1-ectoTMtd-newdel-AE56-6-Cmr4Del-AE76-AF15	RT-Cas1, Cas2, and Marme_0670 over-expressed in MMB-1 with Cmr4 deleted; spacers amplified from plasmid CRISPR03 array; td intron in ssrA
PRJNA382859	MMB1-ectoTMtd-newdel-AE56-6-Cmr4Del-AE76-AF16	RT-Cas1, Cas2, and Marme_0670 over-expressed in MMB-1 with Cmr4 deleted; spacers amplified from plasmid CRISPR03 array; td intron in ssrA
PRJNA382859	MMB1-ectoTMtd-newdel-AE57-8-Cmr4Del-AE77-AF17	RT-Cas1, Cas2, and Marme_0670 over-expressed in MMB-1 with Cmr4 deleted; spacers amplified from plasmid CRISPR03 array; td intron in ssrA
PRJNA382859	MMB1-ectoTMtd-newdel-AE57-8-Cmr4Del-AE77-AF18	RT-Cas1, Cas2, and Marme_0670 over-expressed in MMB-1 with Cmr4 deleted; spacers amplified from plasmid CRISPR03 array; td intron in ssrA
PRJNA382859	MMB1-ectoTMtd-newdel-AE58-10-Cmr2mut-AE78-AF19	RT-Cas1, Cas2, and Marme_0670 over-expressed in MMB-1 with Cmr2 GGAA mutation; spacers amplified from plasmid CRISPR03 array; td intron in ssrA
PRJNA382859	MMB1-ectoTMtd-newdel-AE58-10-Cmr2mut-AE78-AF20	RT-Cas1, Cas2, and Marme_0670 over-expressed in MMB-1 with Cmr2 GGAA mutation; spacers amplified from plasmid CRISPR03 array; td intron in ssrA
PRJNA382859	MMB1-ectoTMtd-newdel-AE59-12-Cmr2mut-AE79-AF21	RT-Cas1, Cas2, and Marme_0670 over-expressed in MMB-1 with Cmr2 GGAA mutation; spacers amplified from plasmid CRISPR03 array; td intron in ssrA
PRJNA382859	MMB1-ectoTMtd-newdel-AE59-12-Cmr2mut-AE79-AF22	RT-Cas1, Cas2, and Marme_0670 over-expressed in MMB-1 with Cmr2 GGAA mutation; spacers amplified from plasmid CRISPR03 array; td intron in ssrA
PRJNA382859	MMB1-ectoTMtd-newdel-AE60-14-Cmr4mut-AE80-AF23	RT-Cas1, Cas2, and Marme_0670 over-expressed in MMB-1 with Cmr4 D26A mutation; spacers amplified from plasmid CRISPR03 array; td intron in ssrA
PRJNA382859	MMB1-ectoTMtd-newdel-AE60-14-Cmr4mut-AE80-AF24	RT-Cas1, Cas2, and Marme_0670 over-expressed in MMB-1 with Cmr4 D26A mutation; spacers amplified from plasmid CRISPR03 array; td intron in ssrA
PRJNA382859	MMB1-ectoTMtd-newdel-AE61-16-Cmr4mut-AE81-AF25	RT-Cas1, Cas2, and Marme_0670 over-expressed in MMB-1 with Cmr4 D26A mutation; spacers amplified from plasmid CRISPR03 array; td intron in ssrA
PRJNA382859	MMB1-ectoTMtd-newdel-AE61-16-Cmr4mut-AE81-AF26	RT-Cas1, Cas2, and Marme_0670 over-expressed in MMB-1 with Cmr4 D26A mutation; spacers amplified from plasmid CRISPR03 array; td intron in ssrA
PRJNA382859	MMB1-ectoTMtd-newdel-AE62-17-GFPCmr2-AE82-AF27	RT-Cas1, Cas2, and Marme_0670 over-expressed in MMB-1 with GFP fused to Cmr2; spacers amplified from plasmid CRISPR03 array; td intron in ssrA
PRJNA382859	MMB1-ectoTMtd-newdel-AE62-17-GFPCmr2-AE82-AF28	RT-Cas1, Cas2, and Marme_0670 over-expressed in MMB-1 with GFP fused to Cmr2; spacers amplified from plasmid CRISPR03 array; td intron in ssrA
PRJNA382859	MMB1-ectoTMtd-newdel-AE63-20-GFPCmr2-AE83-AF29	RT-Cas1, Cas2, and Marme_0670 over-expressed in MMB-1 with GFP fused to Cmr2; spacers amplified from plasmid CRISPR03 array; td intron in ssrA
PRJNA382859	MMB1-ectoTMtd-newdel-AE63-20-GFPCmr2-AE83-AF30	RT-Cas1, Cas2, and Marme_0670 over-expressed in MMB-1 with GFP fused to Cmr2; spacers amplified from plasmid CRISPR03 array; td intron in ssrA
PRJNA382859	MMB1-ectoTMtd-cas123-AL49-1-cas123del-AL72-AL78	RT-Cas1, Cas2, and Marme_0670 over-expressed in MMB-1 with I-F cas1 and cas2-3 genes partially removed; spacers amplified from plasmid CRISPR03 array; td intron in ssrA
PRJNA382859	MMB1-ectoTMtd-cas123-AL49-1-cas123del-AL72-AL79	RT-Cas1, Cas2, and Marme_0670 over-expressed in MMB-1 with I-F cas1 and cas2-3 genes partially removed; spacers amplified from plasmid CRISPR03 array; td intron in ssrA
PRJNA382859	MMB1-ectoTMtd-cas123-AL50-3-cas123del-AL73-AL80	RT-Cas1, Cas2, and Marme_0670 over-expressed in MMB-1 with I-F cas1 and cas2-3 genes partially removed; spacers amplified from plasmid CRISPR03 array; td intron in ssrA
PRJNA382859	MMB1-ectoTMtd-cas123-AL50-3-cas123del-AL73-AL81	RT-Cas1, Cas2, and Marme_0670 over-expressed in MMB-1 with I-F cas1 and cas2-3 genes partially removed; spacers amplified from plasmid CRISPR03 array; td intron in ssrA
PRJNA382859	MMB1-ectoTMtd-newdel-AE64-22-IFarDel-AE84-AF31	RT-Cas1, Cas2, and Marme_0670 over-expressed in MMB-1 with I-F CRISPR04 array deleted; spacers amplified from plasmid CRISPR03 array; td intron in ssrA
PRJNA382859	MMB1-ectoTMtd-newdel-AE64-22-IFarDel-AE84-AF32	RT-Cas1, Cas2, and Marme_0670 over-expressed in MMB-1 with I-F CRISPR04 array deleted; spacers amplified from plasmid CRISPR03 array; td intron in ssrA
PRJNA382859	MMB1-ectoTMtd-newdel-AE65-24-IFarDel-AE85-AF33	RT-Cas1, Cas2, and Marme_0670 over-expressed in MMB-1 with I-F CRISPR04 array deleted; spacers amplified from plasmid CRISPR03 array; td intron in ssrA
PRJNA382859	MMB1-ectoTMtd-newdel-AE65-24-IFarDel-AE85-AF34	RT-Cas1, Cas2, and Marme_0670 over-expressed in MMB-1 with I-F CRISPR04 array deleted; spacers amplified from plasmid CRISPR03 array; td intron in ssrA
PRJNA382859	MMB1-ectoTMtd-newdel-AE66-26-IFopDel-AE86-AF35	RT-Cas1, Cas2, and Marme_0670 over-expressed in MMB-1 with I-F operon deleted; spacers amplified from plasmid CRISPR03 array; td intron in ssrA
PRJNA382859	MMB1-ectoTMtd-newdel-AE66-26-IFopDel-AE86-AF36	RT-Cas1, Cas2, and Marme_0670 over-expressed in MMB-1 with I-F operon deleted; spacers amplified from plasmid CRISPR03 array; td intron in ssrA
PRJNA382859	MMB1-ectoTMtd-newdel-AE67-27-IFopDel-AE87-AF37	RT-Cas1, Cas2, and Marme_0670 over-expressed in MMB-1 with I-F operon deleted; spacers amplified from plasmid CRISPR03 array; td intron in ssrA
PRJNA382859	MMB1-ectoTMtd-newdel-AE67-27-IFopDel-AE87-AF38	RT-Cas1, Cas2, and Marme_0670 over-expressed in MMB-1 with I-F operon deleted; spacers amplified from plasmid CRISPR03 array; td intron in ssrA
PRJNA382859	MMB1-ectoTMtd-newdel-AE68-30-IFdelIIIBdel-AE88-AF39	RT-Cas1, Cas2, and Marme_0670 over-expressed in MMB-1 with III-B and I-F operons deleted; spacers amplified from plasmid CRISPR03 array; td intron in ssrA
PRJNA382859	MMB1-ectoTMtd-newdel-AE68-30-IFdelIIIBdel-AE88-AF40	RT-Cas1, Cas2, and Marme_0670 over-expressed in MMB-1 with III-B and I-F operons deleted; spacers amplified from plasmid CRISPR03 array; td intron in ssrA
PRJNA382859	MMB1-ectoTMtd-newdel-AE69-32-IFdelIIIBdel-AE89-AF41	RT-Cas1, Cas2, and Marme_0670 over-expressed in MMB-1 with III-B and I-F operons deleted; spacers amplified from plasmid CRISPR03 array; td intron in ssrA
PRJNA382859	MMB1-ectoTMtd-newdel-AE69-32-IFdelIIIBdel-AE89-AF42	RT-Cas1, Cas2, and Marme_0670 over-expressed in MMB-1 with III-B and I-F operons deleted; spacers amplified from plasmid CRISPR03 array; td intron in ssrA
PRJNA382859	MMB1newdel-genomeSeq-MMB1SS-AE50	Whole genome sequencing of WT MMB-1 strain
PRJNA382859	MMB1newdel-genomeSeq-OpDel-AE51	Whole genome sequencing of MMB-1 with III-B operon deleted
PRJNA382859	MMB1newdel-genomeSeq-CmrDel-AE52	Whole genome sequencing of MMB-1 with cmr gene cassette deleted
PRJNA382859	MMB1newdel-genomeSeq-Cmr2del-AE42	Whole genome sequencing of MMB-1 with Cmr2 deleted
PRJNA382859	MMB1newdel-genomeSeq-Cmr2mut-AE44	Whole genome sequencing of MMB-1 with Cmr4 deleted
PRJNA382859	MMB1newdel-genomeSeq-Cmr4del-AE43	Whole genome sequencing of MMB-1 with Cmr2 GGAA mutation
PRJNA382859	MMB1newdel-genomeSeq-Cmr4mut-AE45	Whole genome sequencing of MMB-1 with Cmr4 D26A mutation
PRJNA382859	MMB1newdel-genomeSeq-GFPCmr2-AE46	Whole genome sequencing of MMB-1 with GFP fused to Cmr2
PRJNA382859	MMB1newdel-genomeSeq-Cas123Del-AL51	Whole genome sequencing of MMB-1 with I-F cas1 and cas2-3 genes partially removed
PRJNA382859	MMB1newdel-genomeSeq-IFarrayDel-AE47	Whole genome sequencing of MMB-1 with I-F CRISPR04 array deleted
PRJNA382859	MMB1newdel-genomeSeq-IFdelIIIBdel-AE49	Whole genome sequencing of MMB-1 with I-F operon deleted
PRJNA382859	MMB1newdel-genomeSeq-IFoperonDel-AE48	Whole genome sequencing of MMB-1 with III-B and I-F operons deleted
PRJNA382859	MMB1newdel-genomeSeq-IVIApo86-AL01	Whole genome sequencing of Marinomonas mediterranea IVIA-Po-186 isolated from the Balearic Islands in 2004
PRJNA382859	MMB1newdel-genomeSeq-CPR1-AL02	Whole genome sequencing of Marinomonas mediterranea CPR1 isolated from roots of Posidonia oceanica seagrass in 2005
PRJNA382859	phageSeq-CPG1g-DNA-AB86	Whole genome sequencing of MMB-1 lysate generated by infection with Marinomonas phage CPG1g
PRJNA382859	phageSeq-CPP1m-DNA-AB87	Whole genome sequencing of MMB-1 lysate generated by infection with Marinomonas phage CPP1m
PRJNA382859	MMB1isolates-hailmary-phageCB5B-AM69	Whole genome sequencing of MMB-1 lysate generated by infection with Marinomonas phage CB5A
PRJNA382859	MMB1phage-escape-11-AN09	Whole genome sequencing of MMB-1 lysate generated by infection with Marinomonas phage CB5A evolved by passaging on an MMB-1 strain lacking the type III-B CRISPR operon. Laboratory evolution experiment 1 isolate 1.
PRJNA382859	MMB1phage-escape-12-AN10	Whole genome sequencing of MMB-1 lysate generated by infection with Marinomonas phage CB5A evolved by passaging on an MMB-1 strain lacking the type III-B CRISPR operon. Laboratory evolution experiment 1 isolate 2.
PRJNA382859	MMB1phage-escape-21-AN11	Whole genome sequencing of MMB-1 lysate generated by infection with Marinomonas phage CB5A evolved by passaging on an MMB-1 strain lacking the type III-B CRISPR operon. Laboratory evolution experiment 2 isolate 1.
PRJNA382859	MMB1phage-escape-22-AN12	Whole genome sequencing of MMB-1 lysate generated by infection with Marinomonas phage CB5A evolved by passaging on an MMB-1 strain lacking the type III-B CRISPR operon. Laboratory evolution experiment 2 isolate 2.
PRJNA382859	MMB1phage-escape-31-AN13	Whole genome sequencing of MMB-1 lysate generated by infection with Marinomonas phage CB5A evolved by passaging on an MMB-1 strain lacking the type III-B CRISPR operon. Laboratory evolution experiment 3 isolate 1.
PRJNA382859	MMB1phage-escape-32-AN14	Whole genome sequencing of MMB-1 lysate generated by infection with Marinomonas phage CB5A evolved by passaging on an MMB-1 strain lacking the type III-B CRISPR operon. Laboratory evolution experiment 3 isolate 2.
PRJNA382859	MMB1phage-escape-41-AN15	Whole genome sequencing of MMB-1 lysate generated by infection with Marinomonas phage CB5A evolved by passaging on an MMB-1 strain lacking the type III-B CRISPR operon. Laboratory evolution experiment 4 isolate 1.
PRJNA382859	MMB1phage-escape-51-AN17	Whole genome sequencing of MMB-1 lysate generated by infection with Marinomonas phage CB5A evolved by passaging on an MMB-1 strain lacking the type III-B CRISPR operon. Laboratory evolution experiment 5 isolate 1.
PRJNA382859	MMB1phage-escape-52-AN18	Whole genome sequencing of MMB-1 lysate generated by infection with Marinomonas phage CB5A evolved by passaging on an MMB-1 strain lacking the type III-B CRISPR operon. Laboratory evolution experiment 5 isolate 2.
PRJNA382859	MMB1phage-escape-61-AN19	Whole genome sequencing of MMB-1 lysate generated by infection with Marinomonas phage CB5A evolved by passaging on an MMB-1 strain lacking the type III-B CRISPR operon. Laboratory evolution experiment 6 isolate 1.
PRJNA382859	MMB1phage-escape-62-AN20	Whole genome sequencing of MMB-1 lysate generated by infection with Marinomonas phage CB5A evolved by passaging on an MMB-1 strain lacking the type III-B CRISPR operon. Laboratory evolution experiment 6 isolate 2.
